# Supplementary material for: Low FNDC5/Irisin expression is associated with aggressive phenotypes in gastric cancer
Source: Front Pharmacol. 2022 Oct 28;13:981201. doi: 10.3389/fphar.2022.981201 (PMC9649517; doi:10.3389/fphar.2022.981201)
Supplement: Supplementary file 11 [file Table10.XLSX]

## Sheet: riskscore (12)
Tag	Time	Status	RiskScore
GSM1523977	1	1	3.33154
GSM1523826	2.7	1	2.77224
GSM1523781	2.93333	1	3.69082
GSM1523825	4	1	2.9596
GSM1523773	4.33333	1	3.74617
GSM1523866	4.36667	1	2.58016
GSM1523782	4.4	1	2.65206
GSM1523805	4.46667	1	2.92
GSM1523941	4.53333	1	2.48995
GSM1523943	5.53333	1	2.5265
GSM1523886	5.6	1	3.39633
GSM1523938	5.76667	1	3.74896
GSM1523828	5.86667	1	2.98494
GSM1524004	5.93333	1	2.59539
GSM1523817	6.23333	1	2.51485
GSM1523925	6.3	1	4.45219
GSM1523995	6.36667	1	2.52618
GSM1523972	6.5	1	2.96847
GSM1523980	6.7	1	2.53323
GSM1523803	7.06667	1	2.38882
GSM1523975	7.2	1	3.53913
GSM1524022	8.03333	1	3.16527
GSM1523788	8.26667	1	2.94217
GSM1524019	8.33333	1	2.64025
GSM1523875	8.46667	1	3.19991
GSM1524038	8.63333	1	2.47803
GSM1523747	8.7	1	3.225
GSM1523982	8.7	1	3.05021
GSM1523833	8.86667	1	2.06133
GSM1523920	9.33333	1	3.07643
GSM1523979	9.43333	1	2.30627
GSM1524005	9.46667	1	2.88347
GSM1523961	9.5	1	2.23733
GSM1523845	9.66667	1	3.03131
GSM1523818	9.83333	1	2.4842
GSM1523772	10.0333	1	3.93751
GSM1523949	10.1	1	3.59193
GSM1523983	10.1	1	2.50813
GSM1523819	10.1	1	2.9186
GSM1523838	10.3333	1	2.34838
GSM1524007	10.3667	1	3.6779
GSM1524008	10.8333	1	2.27586
GSM1524042	10.8333	1	2.74331
GSM1523939	11.2333	1	4.0662
GSM1524014	11.3333	1	2.4974
GSM1523965	11.4667	1	2.96838
GSM1523785	11.7667	1	2.80285
GSM1523789	11.8	1	2.46204
GSM1524039	12.0667	1	2.92844
GSM1523932	12.6667	1	2.43513
GSM1523771	12.6667	1	3.96534
GSM1523806	12.7	1	2.50493
GSM1523934	12.8	1	2.60421
GSM1524021	12.9333	1	2.5928
GSM1523877	13.1	1	2.39339
GSM1524052	13.1667	1	3.54359
GSM1523971	13.3	1	3.5011
GSM1523769	13.7333	1	2.59215
GSM1524056	14.1667	1	2.38181
GSM1523990	14.1667	1	2.90373
GSM1523765	14.2	1	2.4013
GSM1523857	14.4333	1	3.6819
GSM1523988	14.8333	1	4.39549
GSM1523881	14.9	1	2.36934
GSM1523872	15.0333	1	2.52644
GSM1523970	15.7	1	2.37898
GSM1524057	15.9333	1	4.40972
GSM1523978	16.2333	1	2.27954
GSM1523780	16.4	1	2.53679
GSM1524043	16.8333	1	2.36778
GSM1523858	17.1	1	4.31546
GSM1523959	17.4333	1	2.20283
GSM1523945	17.5333	1	3.67742
GSM1523936	17.5667	1	2.75628
GSM1523832	17.6667	1	3.04656
GSM1523969	17.9	1	2.82797
GSM1523987	18.2667	1	2.84341
GSM1523937	19.6667	1	2.57454
GSM1524010	19.7	1	3.25297
GSM1523940	20.0333	1	3.19942
GSM1523893	20.1	1	2.42002
GSM1523962	20.1333	1	3.67169
GSM1523992	20.1333	1	2.49152
GSM1523862	21	1	4.06248
GSM1523998	21.2333	1	2.42241
GSM1523911	21.8333	1	2.4418
GSM1523855	21.9333	1	2.31415
GSM1523770	22.0667	1	2.25034
GSM1523840	22.8333	1	3.02877
GSM1524044	22.8667	1	2.83905
GSM1524037	23.4333	1	2.77131
GSM1523922	23.6	1	2.446
GSM1523820	23.7	1	2.53495
GSM1523873	24.0333	1	2.37688
GSM1523768	24.2333	1	2.97953
GSM1524015	24.8667	1	2.88994
GSM1523815	25.1667	1	2.57393
GSM1523997	25.2	1	2.62617
GSM1523746	25.5	1	3.08643
GSM1523843	25.8667	1	2.6064
GSM1524006	26.2667	1	3.69555
GSM1523923	26.4	1	2.32821
GSM1523837	26.8333	1	2.1631
GSM1523794	27	1	2.95684
GSM1523948	27.4667	1	3.1932
GSM1524016	27.8	1	2.45087
GSM1523849	28.0333	1	3.5096
GSM1523896	28.0333	1	2.3439
GSM1523918	28.1333	1	3.78164
GSM1523797	28.2667	1	3.08046
GSM1523786	28.4667	1	2.67024
GSM1523831	30.9	1	2.57603
GSM1523852	31	1	2.42849
GSM1524029	31.1	1	3.95998
GSM1523956	31.1333	1	2.93694
GSM1524030	31.3333	1	3.9408
GSM1523867	33.2667	1	2.52339
GSM1523955	34.3667	1	3.0496
GSM1523996	35.2	1	2.69201
GSM1523894	35.7667	1	2.4111
GSM1524040	36.1667	1	2.55078
GSM1523850	36.4	1	3.43506
GSM1524055	37.9333	1	3.04644
GSM1523883	39.5333	1	2.31568
GSM1523903	39.8	1	2.68019
GSM1523841	42.0667	1	2.4244
GSM1523860	42.2	1	2.29082
GSM1524072	42.9333	1	3.13778
GSM1524034	44.0667	1	2.87989
GSM1523834	44.5667	1	2.77025
GSM1523968	45.1667	1	4.0914
GSM1523963	45.7667	1	2.55582
GSM1524048	46.8	1	2.48872
GSM1524028	47.7	1	2.75025
GSM1523842	48.7333	1	3.43285
GSM1523966	51.8	1	2.74395
GSM1523951	53.0333	1	2.52793
GSM1523859	53.1333	0	2.54125
GSM1523830	53.4333	1	2.25265
GSM1523928	54.1333	1	2.29857
GSM1523910	54.3333	0	2.49535
GSM1523909	54.5333	0	2.28815
GSM1523908	55.0667	0	2.49265
GSM1523905	55.3	0	2.25342
GSM1523906	55.3	0	2.38161
GSM1523904	55.3667	0	2.71694
GSM1523976	56	1	2.75489
GSM1524050	57.1333	1	2.52074
GSM1523901	57.4667	0	2.38325
GSM1523796	57.6333	1	2.93436
GSM1523899	58.0667	0	2.60523
GSM1523898	58.8333	0	2.26179
GSM1523897	58.8667	0	2.79177
GSM1523895	59.0333	0	2.33606
GSM1523892	59.4667	0	2.40105
GSM1523890	59.5667	0	2.4883
GSM1523891	59.5667	0	2.62157
GSM1523889	59.6667	0	2.46427
GSM1524027	59.7	1	2.48057
GSM1523888	59.9	0	2.29616
GSM1523887	60.2	0	2.42948
GSM1523885	60.2333	0	2.18972
GSM1523884	60.4333	0	2.64637
GSM1523882	60.7	0	2.12831
GSM1523880	60.9667	0	2.25774
GSM1523879	61.1667	0	2.6
GSM1523798	61.8333	1	2.53308
GSM1523878	61.8667	0	2.37805
GSM1523876	61.9	0	2.33117
GSM1523874	62.1	0	2.78676
GSM1523871	62.3667	0	2.35693
GSM1523870	62.4667	0	2.24195
GSM1523869	62.5333	0	2.32817
GSM1523868	63.2667	0	2.89352
GSM1523865	63.7	0	2.39382
GSM1523864	63.9667	0	2.44147
GSM1523863	64.5667	0	2.21488
GSM1523861	64.8	0	2.2567
GSM1524009	65	1	2.60704
GSM1523856	66.2	0	2.57972
GSM1523853	66.7333	0	2.21843
GSM1523854	66.7333	0	2.57661
GSM1523851	67.2333	0	2.4306
GSM1523993	68.1333	1	2.53393
GSM1523847	68.1333	0	2.34366
GSM1523848	68.1333	0	2.40091
GSM1523950	68.2	0	2.1399
GSM1523846	68.3667	0	2.52133
GSM1523947	68.4333	0	2.28925
GSM1523844	68.9	0	2.54539
GSM1523946	68.9333	0	2.51178
GSM1523926	69.0333	0	2.42635
GSM1523839	69.1333	0	2.58679
GSM1523836	69.2333	0	2.36726
GSM1523835	69.3	0	3.42712
GSM1523944	69.6333	0	2.14397
GSM1523829	69.8333	0	2.6314
GSM1524047	69.8667	0	2.48892
GSM1523827	70.0333	0	2.51648
GSM1524062	70.2	1	3.72538
GSM1523942	70.2667	0	2.5358
GSM1523824	70.6667	0	2.48695
GSM1523823	70.9	0	2.24172
GSM1523822	70.9667	0	2.29905
GSM1523821	71.1	0	2.49783
GSM1523816	72.0667	0	2.39381
GSM1523814	72.7333	0	2.99263
GSM1523812	72.8333	0	2.36728
GSM1523813	72.8333	0	2.49506
GSM1523811	72.8667	0	2.41626
GSM1523810	73.0667	0	2.55578
GSM1523809	73.4333	0	2.20756
GSM1523808	73.5	0	2.74275
GSM1523807	73.7333	0	2.48823
GSM1523933	75.2667	0	2.43064
GSM1523804	76.7	0	2.57655
GSM1523802	76.7667	0	2.53879
GSM1523800	76.9333	0	2.37925
GSM1523801	76.9333	0	2.42311
GSM1524032	77.2	1	2.43658
GSM1524041	77.3333	0	2.38613
GSM1523799	77.5	0	3.02298
GSM1523985	77.5333	1	2.42887
GSM1523931	77.6	0	2.4863
GSM1523930	78.5333	0	2.74535
GSM1524036	79.9333	0	2.45145
GSM1523795	80.0667	0	2.20201
GSM1524035	80.3	0	3.20022
GSM1523793	80.7333	0	2.30719
GSM1523927	80.7667	0	2.50888
GSM1523792	80.8	0	2.33713
GSM1524033	80.8333	0	2.55416
GSM1523790	80.9333	0	2.36915
GSM1523791	81.1333	0	2.17774
GSM1524025	81.8333	1	2.54246
GSM1524031	82	0	2.26419
GSM1523924	82.2	0	2.6616
GSM1523921	83.3	0	2.48878
GSM1524026	83.6	0	2.5219
GSM1524023	83.8333	0	2.17908
GSM1523919	84.1	0	2.56235
GSM1524020	84.3	0	2.68423
GSM1524061	84.6	0	2.07356
GSM1524018	84.7667	0	2.27725
GSM1523953	84.7667	0	3.15466
GSM1524060	84.8333	0	3.41594
GSM1524017	85.0333	0	2.51582
GSM1524059	85.2	0	3.36693
GSM1524012	85.2333	0	2.65166
GSM1524058	85.4667	0	3.12008
GSM1524069	85.6	1	2.19884
GSM1524003	85.9333	0	2.35716
GSM1524002	86.1333	0	2.07954
GSM1523994	86.3667	0	2.61863
GSM1524054	86.5667	0	2.38261
GSM1523989	86.7	0	3.03236
GSM1523986	86.8	0	2.68822
GSM1524053	86.9333	0	2.3524
GSM1523973	87.2667	0	2.17499
GSM1524051	87.2667	0	2.59297
GSM1523935	87.4	0	2.89523
GSM1524049	87.8	0	2.53826
GSM1524046	88.0333	0	2.71134
GSM1523728	88.2333	0	2.31617
GSM1523729	88.2333	0	2.5393
GSM1523929	88.3333	0	2.2696
GSM1523727	88.7333	0	2.32271
GSM1524045	89.1333	0	2.44
GSM1524024	89.4333	1	2.42209
GSM1523787	89.6333	0	2.50348
GSM1524013	89.9	0	2.39221
GSM1524011	90.2	0	2.66116
GSM1524071	90.7667	0	2.69455
GSM1523784	91.3	0	2.41473
GSM1524070	91.6333	0	2.39011
GSM1523783	91.9333	0	2.64981
GSM1523779	92.6	0	2.12844
GSM1523778	92.6333	0	2.80968
GSM1524068	92.8667	0	2.38617
GSM1523777	92.9333	0	2.4866
GSM1524001	93.6333	0	2.44946
GSM1523999	93.8667	0	2.32702
GSM1524000	93.8667	0	2.50948
GSM1523991	95.2	0	2.44811
GSM1523984	96.9667	0	2.76043
GSM1523981	97.2	0	3.09414
GSM1523776	97.4667	0	2.30843
GSM1523775	97.6	0	2.50219
GSM1523774	97.7	0	3.58467
GSM1523974	98.2333	0	1.89647
GSM1523967	98.4667	0	2.8149
GSM1523964	98.5333	0	2.39982
GSM1523960	99	0	2.33892
GSM1523958	100.233	0	2.47287
GSM1523957	100.633	0	2.52571
GSM1523952	100.867	0	2.73136
GSM1523954	100.867	0	2.29695
GSM1523748	104.933	0	2.58932
GSM1523745	105.533	0	2.3503
GSM1523744	105.7	0	2.42304
